# Supplementary material
Source: publisher figshare collection journal article supplement (https://gsapubs.figshare.com/ndownloader/files/23295521)
Supplement: Supplementary file 1 [file 23295521]

## Mathematical derivation

Our mathematical model is based on 1D fluid dynamic shear models (e.g. Turcotte and Schubert, 2002). We apply a constitutive equation in the form of a dislocation creep flow law

$$\dot{\gamma} = A e^{\left(\frac{-Q}{RT}\right)} \sigma^n, \quad (1)$$

where  $\dot{\gamma} = \partial v / \partial z$  is the shear strain rate,  $z$  is the vertical coordinate across the shear zone being zero at the base and increasing positively upwards,  $v$  is the horizontal (i.e. parallel to the shear zone) velocity,  $\sigma$  is the shear stress,  $A$  is a pre-exponential factor,  $n$  is the power-law stress exponent,  $Q$  is the activation energy,  $R$  is the gas constant and  $T$  is the temperature. We solve (1) for  $\sigma$  which yields

$$\sigma = \left[ A e^{\frac{-Q}{RT}} \right]^{-1/n} \dot{\gamma}^{1/n} \quad (2)$$

This can be more generally expressed as

$$\sigma = \mu \dot{\gamma}^{1/n} \quad (3)$$

where  $\mu$  is a viscosity coefficient. We assume a normal geotherm and, hence, that the temperature increases linearly with depth inside the shear zone

$$T = T_0 - \theta z \quad (4)$$

where  $T_0$  is the temperature at the base of the shear zone and  $\theta$  is the temperature gradient.

Substituting (4) into (2) provides the viscosity factor in (3):

$$\mu = A^{-1/n} e^{\frac{Q}{nR(T_0 - \theta z)}} \quad (5)$$

It is difficult to derive an analytical solution for terms of the form  $e^{1/z}$  as in (5). A common simplification is to use the Frank-Kamenetzky approximation which employs a term of the form  $e^z$ . The alternative viscosity coefficient  $\eta$  has then the form

$$\eta = \eta_0 e^{z/\lambda} \quad (6)$$

where  $\eta_0$  is the coefficient at the base of the shear zone ( $z=0$ ) and  $\lambda$  is the e-fold length.  $\lambda$  quantifies the distance over which the value of  $\eta$  increases by a factor of e. The material parameters in (5) derived from laboratory rock deformation experiments can be related to the new parameters  $\eta_0$  and  $\lambda$ . The deformation is most intense at the base of the shear zone and, therefore, we want that  $\mu$  is well approximated by  $\eta$  at the base. We require that both the values and the spatial derivatives of  $\mu$  and  $\eta$  are identical at  $z=0$  which provides two equations:

$$\begin{aligned}\mu_{z=0} &= \eta_{z=0} \\ \left[ \frac{\partial \mu}{\partial z} \right]_{z=0} &= \left[ \frac{\partial \eta}{\partial z} \right]_{z=0}\end{aligned}\tag{7}$$

The explicit form of these equations is

$$\begin{aligned}A^{-1/n} e^{\frac{Q}{nRT_0}} &= \eta_0 \\ \frac{A^{-1/n} Q \theta e^{\frac{Q}{nRT_0}}}{nRT_0^2} &= \frac{\eta_0}{\lambda}\end{aligned}\tag{8}$$

Solving the two equations yields

$$\begin{aligned}\eta_0 &= A^{-1/n} e^{\frac{Q}{nRT_0}} \\ \lambda &= \frac{nRT_0^2}{Q\theta}\end{aligned}\tag{9}$$

The expression for the stress can now be written as

$$\sigma = \eta_0 e^{\frac{z}{\lambda}} \left( \frac{\partial v}{\partial z} \right)^{1/n}\tag{10}$$

We consider a 1D horizontal shear zone where the vertical velocities are zero. We assume that horizontal pressure gradients are negligible and, therefore, the 1D force balance is (e.g. Turcotte and Schubert, 2002)

$$\frac{\partial \sigma}{\partial z} = 0\tag{11}$$

Substituting (10) into (11) and using the two kinematic boundary conditions  $v_{z=0} = v_0$  and  $v_{z=W} = 0$ , with W being the shear zone width, yields the velocity

$$v = \frac{v_0 \left( e^{\frac{n(W-z)}{\lambda}} - 1 \right)}{e^{\frac{nW}{\lambda}} - 1} \quad (12)$$

We make the solution for v dimensionless by introducing

$$\begin{aligned} \beta &= \frac{nW}{\lambda} = \frac{Q\theta W}{RT_0^2} \\ \bar{v} &= v/v_0 \\ \bar{z} &= z/W \end{aligned} \quad (13)$$

$\bar{z}$  is the non-dimensional vertical coordinate, and  $\bar{v}$  is the non-dimensional horizontal velocity. The value of  $\beta$  depends on the thickness of the shear zone, W. Using  $\theta = \Delta T / W$  with  $\Delta T$  being the temperature difference between the temperature at the bottom and the top of the shear zone provides an expression for  $\beta$  independent on W:

$$\beta = \frac{Q}{RT_0} \frac{\Delta T}{T_0} \quad (14)$$

The value of  $\beta$  does not depend on the material properties n and  $\eta_0$  but only on the parameters Q,  $\Delta T$  and  $T_0$ . The dimensionless velocity now depends only on  $\beta$ :

$$\bar{v} = \frac{e^{\beta(1-\bar{z})} - 1}{e^{\beta} - 1} \quad (15)$$

The larger the value of  $\beta$  the stronger the strain localizes (Fig. 2).
